# Supplementary material for: Alkalinity biases in CMIP6 Earth system models and implications for simulated CO 2 drawdown via artificial alkalinity enhancement
Source: Copernicus journal article supplement (doi:10.5194/bg-20-3717-2023), 2023-09-15
Supplement: Supplementary file 1 [file bg-20-3717-2023-supplement.pdf]

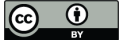

*Supplement of*

## **Alkalinity biases in CMIP6 Earth system models and implications for simulated CO<sub>2</sub> drawdown via artificial alkalinity enhancement**

**Claudia Hinrichs et al.**

*Correspondence to:* Claudia Hinrichs ([claudia.hinrichs@bsh.de](mailto:claudia.hinrichs@bsh.de))

The copyright of individual parts of the supplement might differ from the article licence.

Supplementary figures and tables

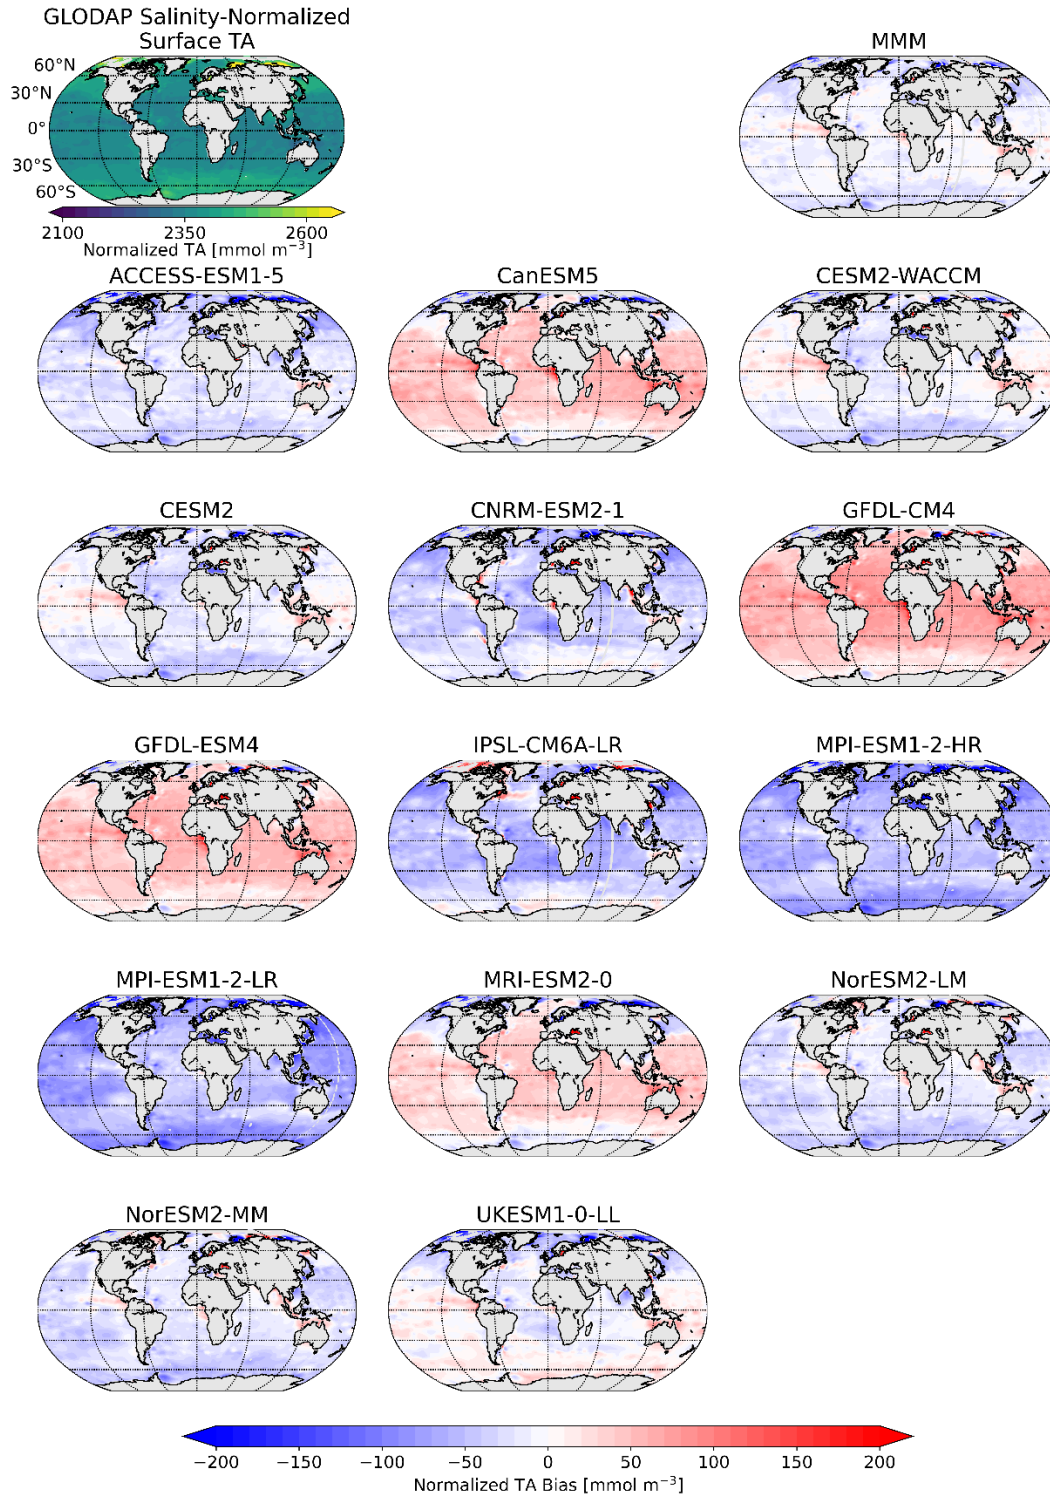

10 Figure S1: Surface distribution of salinity-normalized TA in GLODAP (top left) and the CMIP6 multi-model-mean (MMM) bias (top right) as well as the individual model's biases.

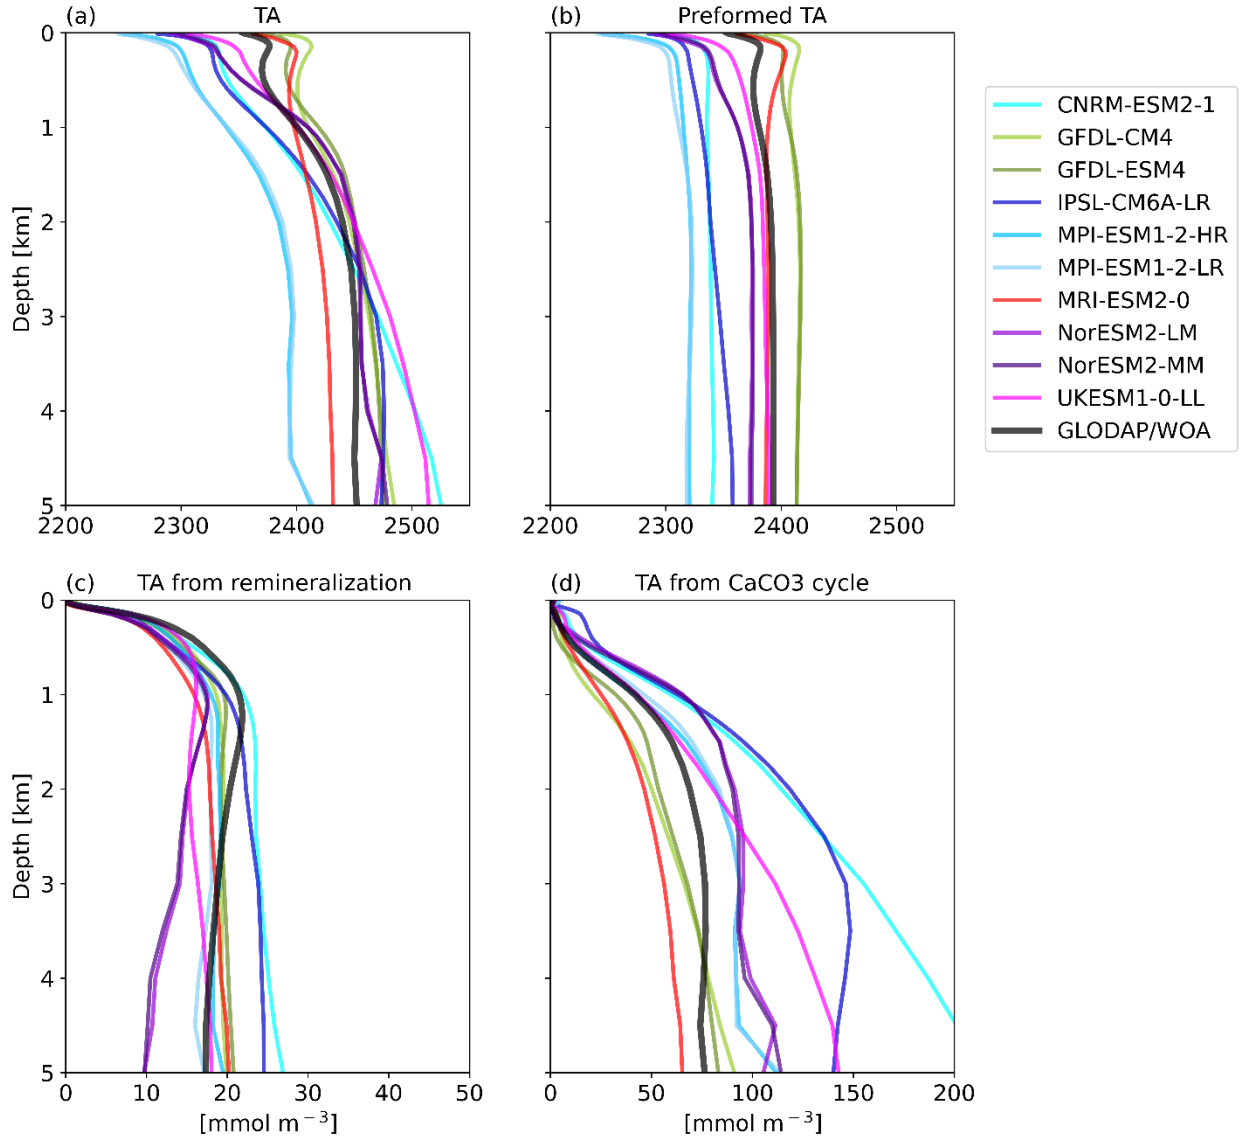

Figure S2: Globally averaged depth profiles of TA, preformed TA ( $TA^0$ ), TA from remineralization ( $TA^r$ ) and from calcium carbonate formation and dissolution ( $TA^*$ ) in 10 CMIP6 models compared to the GLODAP climatology.

- 15 *Table S1: Input values for the CO2SYS calculation of globally averaged TA, DIC and pCO<sub>2</sub>, where the CMIP6 TA and DIC output was converted from units of mmol m<sup>-3</sup> to μmol kg<sup>-1</sup> using a seawater density of 1026 kg/m<sup>3</sup>.*

| Modelname     | Mean surface TA [mmol m <sup>-3</sup> ] | Mean surface DIC [mmol m <sup>-3</sup> ] | Mean surface TA [μmol kg <sup>-1</sup> ] | Mean surface DIC [μmol kg <sup>-1</sup> ] | Mean surface pCO <sub>2</sub> [μatm] |
|---------------|-----------------------------------------|------------------------------------------|------------------------------------------|-------------------------------------------|--------------------------------------|
| ACCESS-ESM1-5 | 2330                                    | 2050                                     | 2271                                     | 1998                                      | 291                                  |
| CanESM5       | 2367                                    | 2093                                     | 2307                                     | 2040                                      | 309                                  |
| CESM2-WACCM   | 2322                                    | 2047                                     | 2263                                     | 1995                                      | 296                                  |
| CESM2         | 2318                                    | 2043                                     | 2259                                     | 1991                                      | 295                                  |
| CNRM-ESM2-1   | 2311                                    | 2042                                     | 2252                                     | 1990                                      | 302                                  |
| GFDL-CM4      | 2403                                    | 2121                                     | 2342                                     | 2067                                      | 306                                  |
| GFDL-ESM4     | 2384                                    | 2100                                     | 2324                                     | 2047                                      | 298                                  |
| IPSL-CM6A-LR  | 2296                                    | 2031                                     | 2238                                     | 1980                                      | 304                                  |
| MPI-ESM1-2-HR | 2278                                    | 2019                                     | 2220                                     | 1968                                      | 309                                  |
| MPI-ESM1-2-LR | 2270                                    | 2015                                     | 2212                                     | 1964                                      | 314                                  |
| MRI-ESM2-0    | 2392                                    | 2103                                     | 2331                                     | 2050                                      | 293                                  |
| NorESM2-LM    | 2305                                    | 2033                                     | 2247                                     | 1981                                      | 296                                  |
| NorESM2-MM    | 2308                                    | 2039                                     | 2250                                     | 1987                                      | 301                                  |
| UKESM1-0-LL   | 2323                                    | 2054                                     | 2264                                     | 2002                                      | 305                                  |
| <b>GLODAP</b> | <b>2354</b>                             | <b>2071</b>                              | <b>2294</b>                              | <b>2019</b>                               | <b>292</b>                           |

- 20 *Table S2: pCO<sub>2</sub> differences in % with respect to GLODAP after an artificial TA increase of 100, 200, 500 or 1.000 μmol kg<sup>-1</sup> for each model as computed with CO2SYS. This computation does NOT account for ocean-air exchange of CO<sub>2</sub> or for chemical reaction upon alkalinity addition. The minimum and the maximum difference values for each case are marked in bold.*

| TA increase (μmol kg <sup>-1</sup> ) | 100                                                 | 200          | 500          | 1000         |
|--------------------------------------|-----------------------------------------------------|--------------|--------------|--------------|
| Modelname                            | pCO <sub>2</sub> difference compared to GLODAP in % |              |              |              |
| ACCESS-ESM1-5                        | 0.16                                                | 0.00         | -0.24        | <b>-0.41</b> |
| CanESM5                              | 6.90                                                | 6.54         | 6.00         | 5.71         |
| CESM2-WACCM                          | 2.83                                                | 2.44         | 1.86         | 1.50         |
| CESM2                                | 2.53                                                | 2.14         | 1.54         | 1.17         |
| CNRM-ESM2-1                          | 6.06                                                | 5.38         | 4.36         | 3.75         |
| GFDL-CM4                             | 4.22                                                | 4.26         | 4.34         | 4.44         |
| GFDL-ESM4                            | 1.54                                                | 1.63         | 1.77         | 1.89         |
| IPSL-CM6A-LR                         | 7.70                                                | 6.81         | 5.47         | 4.66         |
| MPI-ESM1-2-HR                        | 10.63                                               | 9.39         | 7.55         | 6.45         |
| MPI-ESM1-2-LR                        | <b>12.98</b>                                        | <b>11.51</b> | <b>9.33</b>  | <b>8.04</b>  |
| MRI-ESM2-0                           | <b>-1.02</b>                                        | <b>-0.73</b> | <b>-0.28</b> | 0.03         |
| NorESM2-LM                           | 3.55                                                | 3.01         | 2.18         | 1.67         |
| NorESM2-MM                           | 5.83                                                | 5.15         | 4.12         | 3.50         |
| UKESM1-0-LL                          | 6.99                                                | 6.33         | 5.33         | 4.75         |
